# Supplementary material for: Adverse Drug Events and Medication Errors in African Hospitals: A Systematic Review
Source: Springer Nature journal article supplement (doi:10.1007/s40801-017-0125-6), 2017-11-14
Supplement: MOESM1 [file 24440570]

**Title: Adverse Drug Events and Medication Errors in African Hospitals: A Systematic Review**

**Journal name: *Drugs–Real World Outcomes***

Alemayehu B. Mekonnen<sup>1,2\*</sup>, Tariq M. Alhawassi<sup>3,4</sup>, Andrew J. McLachlan<sup>1,5</sup>, Jo-anne E. Brien<sup>1,6</sup>

6

<sup>1</sup>Faculty of Pharmacy, The University of Sydney, Sydney, NSW, Australia

<sup>2</sup>School of Pharmacy, University of Gondar, Gondar, Ethiopia

<sup>3</sup>College of Pharmacy, King Saud University, Riyadh, Saudi Arabia

<sup>4</sup>Medication Safety Research Chair, King Saud University, Riyadh, Saudi Arabia

<sup>5</sup>Centre for Education and Research on Ageing, Concord Hospital, Sydney, NSW, Australia

<sup>6</sup>St Vincent's Hospital Clinical School, Faculty of Medicine, University of New South Wales, Sydney, NSW, Australia

\*Corresponding author:

Email: [aber5592@uni.sydney.edu.au](mailto:aber5592@uni.sydney.edu.au) (ABM)

## Appendix 1: Medline search strategy

|                                                                                 |
|---------------------------------------------------------------------------------|
| <b>1st concept - terms related to medication errors and adverse drug events</b> |
| 1. medication errors.mp.                                                        |
| 2. exp Medication Errors/                                                       |
| 3. exp Medication Systems, Hospital/                                            |
| 4. exp "Drug-Related Side Effects and Adverse Reactions"/                       |
| 5. medication safety.mp.                                                        |
| 6. prescribing errors.mp.                                                       |
| 7. exp Pharmacy Service, Hospital/                                              |
| 8. exp Drug Prescriptions/                                                      |
| 9. dispensing errors.mp.                                                        |
| 10. transcribing errors.mp.                                                     |
| 11. exp Nursing Staff, Hospital/ or administration errors.mp.                   |
| 12. medication history.mp.                                                      |
| 13. exp Medical History Taking/                                                 |
| 14. medication errors.ti.                                                       |
| 15. prescribing errors.ti.                                                      |
| 16. dispensing errors.ti.                                                       |
| 17. administration errors.ti.                                                   |
| 18. adverse drug reactions.ti.                                                  |
| 19. adverse drug events.ti.                                                     |
| <b>2<sup>nd</sup> concept - terms describing hospital setting</b>               |
| 20. exp Hospitals/                                                              |
| 21. exp Hospitalization/                                                        |
| 22. hospitalization.mp.                                                         |
| 23. exp Patient Admission/                                                      |
| 24. admission.mp.                                                               |
| 25. exp Patient Discharge/                                                      |
| 26. discharge.mp.                                                               |

|                                                            |
|------------------------------------------------------------|
| <b>3<sup>rd</sup> concept - describing African regions</b> |
| 27. exp Africa, Western/                                   |
| 28. exp Africa, Northern/                                  |
| 29. exp South Africa/                                      |
| 30. exp Africa, Southern/                                  |
| 31. exp Africa, Eastern/                                   |
| 32. exp Africa, Central/                                   |
| 33. exp "Africa South of the Sahara"/                      |
| 34. Africa.mp.                                             |

The search terms used in each key concept were combined using the OR Boolean operator, and then all the 3 key concepts were connected using the 'AND' operator. Broadly, this searching strategy was similar between databases.

## **S2 Appendix: Excluded articles with reasons**

### *ADE/ADRs reports from single disease/agents*

1. Abah IO, Akanbi M, Abah ME, Finangwai AI, Dady CW, Falang KD, et al. Incidence and predictors of adverse drug events in an African cohort of HIV-infected adults treated with efavirenz. *Germes*. 2015; 5(3):83-91.
2. Abdissa SG, Fekade D, Feleke Y, Seboxa T, Diro E. Adverse drug reactions associated with antiretroviral treatment among adult Ethiopian patients in a tertiary hospital. *Ethiop Med J*. 2012; 50(2):107–13.
3. Adeyemi A, Adesola O, Olaogun O. Risk factors for virologic failure and adverse reactions among patients on triple antiretroviral therapy. *Journal of Acquired Immune Deficiency Syndromes*. 2009; 51:125.
4. Alexander A, Rode H. Adverse reactions to the Bacillus Calmette-Guerin vaccine in HIV-positive infants. *J Pediatr Surg*. 2007; 42(3):549–52.
5. Ankrah DN, Mantel-Teeuwisse AK, De Bruin ML, Amoo PK, Ofei-Palm CN, Agyepong I, et al. Incidence of adverse events among health care workers following H1N1 Mass immunization in Ghana: a prospective study. *Drug Saf*. 2013; 36(4):259–66.
6. Bepe N, Madanhi N, Mudzviti T, Gavi S, Maponga CC, Morse GD. The impact of herbal remedies on adverse effects and quality of life in HIV-infected individuals on antiretroviral therapy. *J Infect Dev Ctries*. 2011; 5(1):48–53.
7. Birbal S, Dheda M, Ojewole E, Oosthuizen F. Adverse drug reactions associated with antiretroviral therapy in South Africa. *African Journal of AIDS Research*. 2016; 15(3):243-8.

8. Bwire R, Kawuma HJ. Hospital-based epidemiological study of reactions, Buluba Hospital, 1985-89. *Leprosy Review*. 1993;64(4):325-9.
9. Elkhabbazi H, Benkirane R, Khadmaoui A, Sefiani H, Quayou A, Hami H, et al. Cutaneous adverse drug reactions in Morocco: A prospective study. *Drug Saf*. 2014; 37 (10):888.
10. Kajungu DK, Erhart A, Talisuna AO, Bassat Q, Karema C, Nabasumba C, et al. Paediatric pharmacovigilance: use of pharmacovigilance data mining algorithms for signal detection in a safety dataset of a paediatric clinical study conducted in seven African countries. *PloS one*. 2014;9(5):e96388.
11. Khaled A, Kharfi M, Ben Hamida M, El Fekih N, El Aidli S, Zeglaoui F, et al. Cutaneous adverse drug reactions in children. A series of 90 cases. *La Tunisie medicale*. 2012; 90(1):45-50.
12. Kiguba R, Ononge S, Karamagi C, Bird SM. Herbal medicine use and linked suspected adverse drug reactions in a prospective cohort of Ugandan inpatients. *BMC complementary and alternative medicine*. 2016; 16:145.
13. Korhonen C, Peterson K, Bruder C, Jung P. Self-reported adverse events associated with antimalarial chemoprophylaxis in peace corps volunteers. *American Journal of Preventive Medicine*. 2007; 33(3):194-9.
14. Lartey M, Asante-Quashie A, Essel A, Kenu E, Ganu V, Neequaye A. Adverse drug reactions to antiretroviral therapy during the early art period at a tertiary hospital in Ghana. *Pan Afr Med J*. 2014; 18(25).
15. Lorent N, Sebatunzi O, Mukeshimana G, Van den Ende J, Clerinx J. Incidence and risk factors of serious adverse events during antituberculous treatment in Rwanda: a prospective cohort study. *PloS ONE*. 2011; 6(5):e19566.

16. Luyckx VA, Steenkamp V, Rubel JR, Stewart MJ. Adverse effects associated with the use of South African traditional folk remedies. *Cent Afr J Med*. 2004; 50(5–6):46–51.
17. Masenyetse LJ, Manda SO, Mwambi HG. An assessment of adverse drug reactions among HIV positive patients receiving antiretroviral treatment in South Africa. *AIDS Research and Therapy*. 2015;12:6.
18. Namme Luma H, Doualla MS, Choukem SP, Temfack E, Ashuntantang G, Achu Joko H, et al. Adverse drug reactions of Highly Active Antiretroviral Therapy (HAART) in HIV infected patients at the General Hospital, Douala, Cameroon: a cross sectional study. *Pan Afr Med J*. 2012; 12:87.
19. Njuguna C, Stewart A, Mouton JP, Blockman M, Maartens G, Swart A, et al. Adverse Drug Reactions Reported to a National HIV & Tuberculosis Health Care Worker Hotline in South Africa: Description and Prospective Follow-Up of Reports. *Drug safety*. 2016; 39(2):159-169.
20. Paul IM, Reynolds KM, Kauffman RE, Banner W, Bond GR, Palmer RB, et al. Adverse events associated with pediatric exposures to dextromethorphan. *Clinical toxicology (Philadelphia, Pa)*. 2017; 55(1):25-32.
21. Peter JG, Lehloeny R, Dlamini S, Risma K, White KD, Konvinse KC, et al. Severe delayed cutaneous and systemic reactions to drugs: A global perspective on the science and art of current practice. *J Allergy Clin Immunol Pract*. 2017; 5(3):547-63.
22. Sabry N, Farid S, Dawoud D. Drug-related problems in cardiac children. *Minerva Pediatr*. 2016;68(2):89-95.
23. Salami TA, Asalu AF, Samuel SO. Prevalence of cutaneous drug eruptions in adult Nigerians with HIV/AIDS. *Nigerian Postgraduate Medical Journal*. 2010; 17(2):160-3.

24. Schnippel K, Berhanu RH, Black A, Firnhaber C, Maitisa N, Evans D, et al. Severe adverse events during second-line tuberculosis treatment in the context of high HIV Co-infection in South Africa: a retrospective cohort study. *BMC Infect Dis.* 2016; 16(1):593.
25. Stewart A, Lehloenya R, Boulle A, de Waal R, Maartens G, Cohen K. Severe antiretroviral-associated skin reactions in South African patients: a case series and case-control analysis. *Pharmacoepidemiology and Drug Safety.* 2016; 25(11):1313-9.
26. Zaraa I, Jones M, Trojjet S, Cheikh Rouhou R, El Euch D, Mokni M, et al. Severe adverse cutaneous drug eruptions: epidemiological and clinical features. *International journal of dermatology.* 2011; 50(7):877-80.
27. Tadesse WT, Mekonnen AB, Tesfaye WH, Tadesse YT. Self-reported adverse drug reactions and their influence on highly active antiretroviral therapy in HIV infected patients: a cross sectional study. *BMC Pharmacol Toxicol.* 2014; 15:32.

*Studies assessing ADR reporting (KAP studies)*

1. Alraie NA, Saad AA, Sabry NA, Farid SF. Adverse drug reactions reporting: a questionnaire-based study on Egyptian pharmacists' attitudes following an awareness workshop. *J Eval Clin Pract.* 2016;22(3):349-55.
2. Bello SO, Umar MT. Knowledge and attitudes of physicians relating to reporting of adverse drug reactions in Sokoto, north-western Nigeria. *Ann Afr Med.* 2011;10(1):13-8.
3. Cliff-Eribo KO, Choonara I, Doodoo A, Darko DM, Sammons H. Adverse drug reactions in Ghanaian children: review of reports from 2000 to 2012 in VigiBase. *Expert opinion on drug safety.* 2015;14(12):1827-33.

4. Elnour AA, Ahmed AD, Yousif MA, Shehab A. Awareness and reporting of adverse drug reactions among health care professionals in Sudan. *Joint Commission journal on quality and patient safety*. 2009;35(6):324-9.
5. Fadare JO, Enwere OO, Afolabi AO, Chedi BAZ, Musa A. Knowledge, attitude and practice of adverse drug reaction reporting among health care workers in a tertiary center in Northern Nigeria. *Trop J Pharm Res*. 2011;10(3):235–42.
6. Gurmesa LT, Dedefo MG. Factors affecting adverse drug reaction reporting of healthcare professionals and their knowledge, attitude, and practice towards ADR reporting in Nekemte town, West Ethiopia. *Biomed Res Int*. 2016;2016:5728462.
7. Kabore L, Millet P, Fofana S, Berdai D, Adam C, Haramburu F. Pharmacovigilance systems in developing countries: An evaluative case study in Burkina Faso. *Drug Saf*. 2013;36(5):349-58.
8. Katusiime B, Semakula D, Lubinga SJ. Adverse drug reaction reporting among health care workers at Mulago National Referral and Teaching hospital in Uganda. *Afr Health Sci*. 2015;15(4):1308-17.
9. Khoza S, Madungwe I, Nyambayo P, Mthethwa J, Chikuni O. Adverse drug reactions reporting at a referral hospital in Zimbabwe. *Cent Afr J Med*. 2004;50(11–12):104–7.
10. Kiguba R, Karamagi C, Waako P, Ndagije HB, Bird SM. Recognition and reporting of suspected adverse drug reactions by surveyed health care professionals in Uganda: key determinants. *BMJ Open*. 2014; 4(11). e005869.
11. Kiguba R, Karamagi C, Waako P, Ndagije HB, Bird SM. Rare, serious and comprehensively described suspected adverse drug reactions reported by surveyed health care professionals in Uganda. *Ann Glob Health*. 2015; 81(1): 77.



12. Kinuani L, Nzolo DB, Aloni MN, Makolo P, Ntamabyaliro N, Ntamba YL, et al. Assessment of attitudes towards adverse events following immunization with oral poliovirus vaccine: a pilot study among high school students of Kinshasa, the Democratic Republic of Congo. *Pathog Glob Health*. 2014; 108(6):292–7.
13. Obebi Cliff-Eribo K, Sammons H, Star K, Ralph Edwards I, Osakwe A, Choonara I. Adverse drug reactions in Nigerian children: a retrospective review of reports submitted to the Nigerian Pharmacovigilance Centre from 2005 to 2012. *Paediatr Int Child Health*. 2016;36(4):300-4
14. Ohaju-Obodo JO, Iribhogbe OI. Extent of pharmacovigilance among resident doctors in Edo and Lagos states of Nigeria. *Pharmacoepidemiol Drug Saf*. 2010;19(2):191–5.
15. Okezie EO, Fawole OI. Adverse drug reactions reporting by physicians in Ibadan, Nigeria. *Pharmacoepidemiology Drug Saf*. 2008;17(5):517–22.
16. Okonkwo PO, Egere JU, Ogbuokiri JE. Adverse drug reactions in a developing country: problems encountered in a surveillance programme in a Nigerian hospital. *Cent Afr J Med*. 1980;26(11):239–42.
17. Ruud KW, Srinivas SC, Toverud E-L. Addressing gaps in pharmacovigilance practices in the antiretroviral therapy program in the Eastern Cape Province, South Africa. *Res Social Adm Pharm*. 2010;6(4):345–53.
18. Sabblah GT, Akweongo P, Darko D, Dodoo ANO, Sulley AM. Adverse drug reaction reporting by doctors in a developing country: a case study from Ghana. *Ghana Med J*. 2014;48(4):189–93.

*Non-relevant outcome*

1. Anyika EN, Alade TB. Evaluation of pharmacists' participation in post-admission ward rounds in a tertiary hospital in South-West Nigeria. *Nig Q J Hosp Med.* 2009;19(3):151–4.
2. El-Shazly AN, Al-Azzouny MA, Soliman DR, Abed NT, Attia SS. Medical errors in neonatal intensive care unit at Benha University Hospital, Egypt. *Eastern Mediterranean Health Journal.* 2017;23(1):31-9.
3. King RC, Fomundam HN. Remodeling pharmaceutical care in Sub-Saharan Africa (SSA) amidst human resources challenges and the HIV/AIDS pandemic. *Int J Health Plann Manage.* 2010;25(1):30–48.
4. Koffuor GA, Anto BP, Abaitey AK. Error-provoking conditions in the medication use process: the case of a government hospital in Ghana. *J Patient Saf.* 2012;8(1):22-5.
5. Lubinga SJ, Uwiduhaye E. Potential drug-drug interactions on in-patient medication prescriptions at Mbarara Regional Referral Hospital (MRRH) in western Uganda: prevalence, clinical importance and associated factors. *Afr Health Sci.* 2011;11(3):499-507.
6. Mouton JP, Mehta U, Rossiter DP, Maartens G, Cohen K. Interrater agreement of two adverse drug reaction causality assessment methods: A randomised comparison of the Liverpool Adverse Drug Reaction Causality Assessment Tool and the World Health Organization-Uppsala Monitoring Centre system. *PloS one.* 2017;12(2):e0172830.
7. Oshikoya KA, Oreagba IA, Godman B, Oguntayo FS, Fadare J, Orubu S, et al. Potential drug-drug interactions in paediatric outpatient prescriptions in Nigeria and implications for the future. *Expert Rev Clin Pharmacol.* 2016;9(11):1505-15.

8. Rowe AK, Onikpo F, Lama M, Deming MS. Risk and protective factors for two types of error in the treatment of children with fever at outpatient health facilities in Benin. *Int J Epidemiol.* 2003;32(2):296–303.
9. Sabry NA, Farid SF. The role of clinical pharmacists as perceived by Egyptian physicians. *The International journal of pharmacy practice.* 2014;22(5):354-9.
10. Schellack N, Martins V, Botha N, Meyer JC. Delivery of pharmaceutical services at ward level in a teaching hospital. *Curationis.* 2009;32(1):74–81.
11. Seden K, Merry C, Hewson R, Siccardi M, Lamorde M, Byakika-Kibwika P, et al. Prevalence and type of drug-drug interactions involving ART in patients attending a specialist HIV outpatient clinic in Kampala, Uganda. *The Journal of antimicrobial chemotherapy.* 2015;70(12):3317-22.
12. Teka F, Teklay G, Ayalew E, Teshome T. Potential drug-drug interactions among elderly patients admitted to medical ward of Ayder Referral Hospital, Northern Ethiopia: a cross sectional study. *BMC Res Notes.* 2016;9(1):431.
13. Tetteh RA, Nartey ET, Lartey M, Mantel-Teeuwisse AK, Leufkens HG, Nortey PA, et al. Adverse events and adherence to HIV post-exposure prophylaxis: a cohort study at the Korle-Bu Teaching Hospital in Accra, Ghana. *BMC Public Health.* 2015;15:573.
14. Thinyane KH, Cooper VLJ. Causes of hospital admission among patients receiving highly active antiretroviral therapy. *Res J Med Sci.* 2013;7(5):130–3.
15. Yusuff K, Awotunde M. The frequency of drug history documentation in an institutionalized tertiary care setting in Nigeria. *Journal of Pharmacy & Pharmaceutical Sciences.* 2005;8(2):141-6.

16. Yusuff KB, Tayo F. Frequency, types and severity of medication use-related problems among medical outpatients in Nigeria. *Int J Clin Pharm.* 2011;33(3):558-64.
17. Yusuff KB, Tayo F. Does a physician's specialty influence the recording of medication history in patients' case notes? *Br J Clin Pharmacol.* 2008;66(2):308–12.

*Conference abstract*

1. Amendezo E, Kambutse I, Maniraguha Y, Habimana B, Padua F, Musabeyezu E, et al. Patterns of suspected adverse drug reactions among in-patients at king faisal referral hospital, Rwanda. *Clin Ther.* 2015;1):e111.
2. Ayetoro SO, Olagunju AO, Laiyemo KA. Evaluation of adverse drug reactions among in-patients admitted into the adult medical wards of university of Ilorin teaching hospital, Nigeria. *Drug Saf.* 2014;37 (10):841-2.
3. Egieyeh S, Egieyeh E, Inyang U, Oqua D. Quantitative and qualitative evaluation of medication errors in four antiretroviral therapy (ART) outpatient clinics federal capital territory, Nigeria. *Basic Clin Pharmacol Toxicol.* 2014;115:84–5.
4. Ganiyu KA, Erah PO, Suleiman IA. Drug therapy problems in patients on antihypertensives with antidiabetic drugs in two tertiary health institutions in Niger Delta region, nigeria. *Value in Health.* 2014;17 (7):A756.
5. Ogunleye O, Oreagba I, Isah A, Bassi P, Ekoja M, Enwere O, et al. Medication errors among health professionals in Nigeria: A national survey. *Basic Clin Pharmacol Toxicol.* 2014;115:75.
6. Mouton J, Njuguna C, Kramer N, Mehta U, Stewart A, Maartens G, et al. Hospitalisation due to Adverse Drug Reactions in South Africa: A Setting of High HIV and Tuberculosis Prevalence. *Drug Saf.* 2015;38(10):1015-.

7. Mouton JP, Jobanputra N, Mehta U, Technau K, Scott C, Cohen K. Adverse drug reactions among Hospitalised Children in South Africa. *Pharmacoepidemiology and Drug Safety*. 2016;25:427.

#### *Non-English*

1. Amor M, Bensghir M, Belkhadir Z, Ghannam A, Azendour H, Drissi Kamili N, et al. [Medication errors in anesthesia: a Moroccan university hospitals survey]. *Annales francaises d'anesthesie et de reanimation*. 2012;31(11):863-9.
2. Camara B, Faye PM, Fall AL, Gueye NRD, Hafni CS, Ba M, et al. Prescription errors in a pediatric hospital department in Dakar, Senegal. *Revue Medecine Tropicale*. 2011;71(1):33–6.
3. Gouyon JB, Cransac A, Sgro C. [Medication errors in neonatal medicine: from prescription to administration]. *Archives de pediatrie : organe officiel de la Societe francaise de pediatrie*. 2012;19(9):976–83.
4. Kourouma HS, Kouassi YI, Diabate A, Sangare A, Ecra EJ, Kaloga M, Gbery IP, et al. Clinical-epidemiological profile of severe cutaneous drug reactions in children in Abidjan (Cote d'Ivoire). *Bulletin de la Societe de pathologie exotique*. 2014;107(3): 142–5.
5. Mabilia-Babela JR, Mouko A, Pandzou N, Moukana P, Samba Louaka C, Senga P. [Drug administration to children at the Brazzaville university hospital]. *Arch Pediatr*. 2009;16(7):1066–8.

#### *Commentaries*

1. Llewellyn RL, Gordon PC, Reed AR. Drug administration errors--time for national action. *S Afr Med J*. 2011;101(5):319–20.

2. Oshikoya KA. Adverse event monitoring of artemisinin combination therapy in Nigeria: the challenges and limitations of the study. *West Afr J Med.* 2010;29(4):221–4.
3. Subrayen D, Naicker P, Schellack N. Medication reconciliation is an essential role for the pharmacist. *Sa Pharmaceutical Journal Incorporating Pharmacy Management.* 2016;83(1):17-21.

#### *Non-African setup*

1. Sanghera IS, Franklin BD, Dhillon S. The attitudes and beliefs of health care professionals on the causes and reporting of medication errors in a UK Intensive care unit. *Anaesthesia.* 2007;62(1):53–61.
2. Wilson RM, Michel P, Olsen S, Gibberd RW, Vincent C, El-Assady R, et al. Patient safety in developing countries: retrospective estimation of scale and nature of harm to patients in hospital. *BMJ.* 2012; 344: e832.

#### *Review*

1. Ambrose O, Isah, Shanthi N, Pal, Sten Olsson, Alexander Dodoo and Rachida Soulayami Bencheikh. Specific features of medicines safety and pharmacovigilance in Africa. *Ther Adv Drug Saf.* 2012; 3(1): 25–34.
2. Cliff-Eribo KO, Sammons H, Choonara I. Systematic review of paediatric studies of adverse drug reactions from pharmacovigilance databases. *Expert opinion on drug safety.* 2016;15(10):1321-8.
3. Ford N, Shubber Z, Meintjes G, Grinsztejn B, Eholie S, Mills EJ, et al. Causes of hospital admission among people living with HIV worldwide: a systematic review and meta-analysis. *Lancet HIV.* 2015;2(10):e438-44.

4. Gonzales K. Medication administration errors and the pediatric population: a systematic search of the literature. *J Pediatr Nurs.* 2010;25(6):555-65.
5. Ogboli-Nwasor E. Medication errors in anaesthetic practice: a report of two cases and review of the literature. *Afr Health Sci.* 2013; 13(3):845-9.
6. Oshikoya KA, Senbanjo IO. Providing safe medicines for children in Nigeria: The impediments and remedies. *Ann Afr Med.* 2010 Oct-Dec; 9(4):203-12.

### S3 Appendix: Methodological quality assessment

#### A. Methodological quality assessment for ADE studies

|                                                                                                                   | Aderemi-Williams 2015 [30] | Benkirane 2009 [31] | Benkirane 2009 [78] | Cooke 1985 [32] | Dedefo 2016 [79] | Eshetie 2015 [33] | Jennane 2011 [80] | Kiguba 2017 [34] | Letaief 2010 [35] | Mabadeje 1979 [35] |
|-------------------------------------------------------------------------------------------------------------------|----------------------------|---------------------|---------------------|-----------------|------------------|-------------------|-------------------|------------------|-------------------|--------------------|
| <b>Study design</b>                                                                                               |                            |                     |                     |                 |                  |                   |                   |                  |                   |                    |
| Was the study design clear (prospective, retrospective, combined)?                                                | Y                          | Y                   | Y                   | Y               | Y                | Y                 | Y                 | Y                | Y                 | Y                  |
| <b>Methods for identifying ADEs</b>                                                                               |                            |                     |                     |                 |                  |                   |                   |                  |                   |                    |
| Were the methods used to identify ADEs described in sufficient detail?                                            | N                          | Y                   | Y                   | N               | Y                | Y                 | Y                 | Y                | N                 | Y                  |
| Were data collection methods (case-record review, medication chart review and laboratory data) clearly described? | Y                          | Y                   | Y                   | NR              | Y                | Y                 | Y                 | Y                | Y                 | Y                  |
| Were the individuals (physicians, pharmacists, nurses) who identifies ADEs clearly described?                     | N                          | Y                   | Y                   | NR              | N                | Y                 | Y                 | Y                | Y                 | N                  |
| <b>Methods for determining the causality</b>                                                                      |                            |                     |                     |                 |                  |                   |                   |                  |                   |                    |
| Was the process of establishing the casual relationship described in detail?                                      | N                          | Y                   | N                   | Unclear         | N                | Y                 | N                 | Y                | Y                 | NR                 |
| Were standard methods (validated tool) used in the assessment?                                                    | N                          | N                   | Y                   | Y               | N                | Y                 | N                 | Y                | Y                 | NR                 |
| <b>Methods for determining preventability</b>                                                                     |                            |                     |                     |                 |                  |                   |                   |                  |                   |                    |
| Was the assessment process of establishing preventability described in detail?                                    | NR                         | N                   | N                   | NR              | Y                | Y                 | N                 | Y                | N                 | NR                 |
| Were standard methods (validated tool) used in the assessment?                                                    |                            | Y                   | N                   | NR              | Y                | Y                 | N                 | Y                | Y                 | NR                 |
| <b>Methods for determining severity</b>                                                                           |                            |                     |                     |                 |                  |                   |                   |                  |                   |                    |
| Was the assessment process of establishing predictability described in detail?                                    | NR                         | N                   | Y                   | NR              | Y                | Y                 | Y                 | Y                | N                 | NR                 |
| Were standard methods (validated tool) used in the assessment?                                                    | NR                         | Y                   | Y                   | NR              | Y                | Y                 | Y                 | Y                | Y                 | NR                 |
| Total                                                                                                             | 2                          | 7                   | 7                   | 2               | 7                | 10                | 6                 | 10               | 7                 | 3                  |

Abbreviation: Y, yes; N, no; NR, not reported



### Methodological quality assessment for ADE studies (Cont'd)

|                                                                                                                   | Matsaseng et al 2005 [37] | Mehta 2008 [38] | Mouton 2015 [39] | Mouton 2016 [40] | Oshikoya 2011 [42] | Tipping 2006 [43] | Tumwikirize 2011 [44] | Oshikoya 2007 [41] |
|-------------------------------------------------------------------------------------------------------------------|---------------------------|-----------------|------------------|------------------|--------------------|-------------------|-----------------------|--------------------|
| <b>Study design</b>                                                                                               |                           |                 |                  |                  |                    |                   |                       |                    |
| Was the study design clear (prospective, retrospective, combined)?                                                | Y                         | Y               | Y                | Y                | Y                  | Y                 | Y                     | Y                  |
| <b>Methods for identifying ADEs</b>                                                                               |                           |                 |                  |                  |                    |                   |                       |                    |
| Were the methods used to identify ADEs described in sufficient detail?                                            | N                         | N               | Y                | Y                | Y                  | N                 | Y                     | Y                  |
| Were data collection methods (case-record review, medication chart review and laboratory data) clearly described? | Y                         | Y               | Y                | Y                | Y                  | N                 | Y                     | Y                  |
| Were the individuals (physicians, pharmacists, nurses) who identifies ADEs clearly described?                     | Y                         | Y               | Y                | Y                | Y                  | Y                 | Y                     | Y                  |
| <b>Methods for determining the causality</b>                                                                      |                           |                 |                  |                  |                    |                   |                       |                    |
| Was the process of establishing the casual relationship described in detail?                                      | Y                         | Y               | Y                | Y                | Y                  | N                 | N                     | Y                  |
| Were standard methods (validated tool) used in the assessment?                                                    | Y                         | Y               | Y                | Y                | Y                  | Y                 | Y                     | Y                  |
| <b>Methods for determining preventability</b>                                                                     |                           |                 |                  |                  |                    |                   |                       |                    |
| Was the assessment process of establishing preventability described in detail?                                    | NR                        | Y               | Y                | Y                | Y                  | NR                | N                     | N                  |
| Were standard methods (validated tool) used in the assessment?                                                    | Y                         | Y               | Y                | Y                | Y                  | NR                | Y                     | N                  |
| <b>Methods for determining severity</b>                                                                           |                           |                 |                  |                  |                    |                   |                       |                    |
| Was the assessment process of establishing predictability described in detail?                                    | NR                        | Y               | N                | Y                | Y                  | NR                | N                     | NR                 |
| Were standard methods (validated tool) used in the assessment?                                                    | Y                         | Y               | N                | Y                | Y                  | NR                | Y                     | NR                 |
| total                                                                                                             | 7                         | 9               | 8                | 10               | 10                 | 3                 | 7                     | 6                  |

Abbreviation: Y, yes; N, no; NR, not reported

**B. Methodological quality assessment: MEs**

|                                                     | Agalu<br>2011<br>[45] | Agalu<br>2012<br>[58] | Ajemigbitse<br>2016 [49] | Ajemigbitse<br>2013 [46] | Ajemigbitse<br>2013 [47] | Ajemigbitse<br>2014 [48] | Alagha<br>2011<br>[50] | Arulogun<br>2011<br>[51] | Oshikoya<br>2007<br>[52] | Sada<br>2015<br>[53] | Yinusa<br>2004<br>[54] |
|-----------------------------------------------------|-----------------------|-----------------------|--------------------------|--------------------------|--------------------------|--------------------------|------------------------|--------------------------|--------------------------|----------------------|------------------------|
| Aims/objectives of the study clearly stated.        | Y                     | Y                     | Y                        | Y                        | Y                        | Y                        | Y                      | Y                        | Y                        | Y                    | Y                      |
| Definition of what constitutes a medication error.  | Y                     | N                     | N                        | Y                        | N                        | Y                        | Y                      | Y                        | Unclear                  | Y                    | N                      |
| Error categories specified.                         | Y                     | Y                     | Y                        | Y                        | Y                        | Y                        | Y                      | Y                        | Y                        | Y                    | Y                      |
| Error categories defined.                           | Y                     | N                     | N                        | Y                        | N                        | Y                        | Y                      | N                        | N                        | Y                    | N                      |
| Presence of a clearly defined denominator.          | Y                     | Y                     | Y                        | Y                        | N                        | N                        | Y                      | Y                        | Unclear                  | N                    | Unclear                |
| Data collection method described clearly.           | Y                     | Y                     | N                        | Y                        | Y                        | Y                        | Y                      | Y                        | Y                        | Y                    | N                      |
| Setting in which study conducted described.         | Y                     | Y                     | Y                        | Y                        | Y                        | Y                        | Y                      | Y                        | Y                        | Y                    | Y                      |
| Sampling and calculation of sample size described.  | N                     | N                     | N                        | Y                        | N                        | N                        | N                      | Y                        | N                        | Y                    | N                      |
| Reliability measures                                | N                     | N                     | N                        | N                        | N                        | N                        | N                      | N                        | N                        | N                    | N                      |
| Measures in place to ensure that results are valid. | N                     | N                     | Y                        | N                        | N                        | N                        | N                      | N                        | N                        | N                    | N                      |
| Limitations of study listed.                        | Y                     | Y                     | Y                        | Y                        | Y                        | N                        | Y                      | N                        | N                        | Y                    | N                      |
| Mention of any assumptions made.                    | N                     | N                     | N                        | N                        | N                        | N                        | N                      | N                        | N                        | N                    | N                      |
| Ethical approval.                                   | Y                     | Y                     | Y                        | Y                        | Y                        | Y                        | N                      | N                        | N                        | Y                    | N                      |
| Total                                               | 9                     | 7                     | 7                        | 10                       | 6                        | 7                        | 8                      | 7                        | 4                        | 9                    | 3                      |

Abbreviation: Y, yes; N, no;

**Methodological quality assessment: MEs (Cont'd)**

|                                                     | Yousif<br>2011<br>[55] | Zelege<br>2014<br>[56] | Amucheazi<br>2009 [61] | Gordon<br>2004<br>[63] | Gordon<br>2006<br>[64] | Feleke<br>2010<br>[65] | Feleke<br>2015<br>[66] | Labuschagne<br>2011 [67] | Llewellyn<br>2009 [68] | Agu 2014<br>[71] | al Tehewy<br>2016 [59] |
|-----------------------------------------------------|------------------------|------------------------|------------------------|------------------------|------------------------|------------------------|------------------------|--------------------------|------------------------|------------------|------------------------|
| Aims/objectives of the study clearly stated.        | Y                      | Y                      | N                      | Y                      | Y                      | Y                      | N                      | Y                        | Y                      | Y                | Y                      |
| Definition of what constitutes a medication error.  | N                      | Y                      | N                      | N                      | N                      | Y                      | Y                      | N                        | Y                      | Y                | Y                      |
| Error categories specified.                         | Y                      | Y                      | Y                      | Y                      | Y                      | Y                      | Y                      | Y                        | Y                      | N                | Y                      |
| Error categories defined.                           | N                      | Y                      | N                      | N                      | N                      | Y                      | Y                      | N                        | N                      | N                | N                      |
| Presence of a clearly defined denominator.          | Y                      | N                      | Y                      | Unclear                | Unclear                | Y                      | N                      | Unclear                  | Y                      | Y                | Y                      |
| Data collection method described clearly.           | Y                      | Y                      | N                      | N                      | N                      | Y                      | N                      | Y                        | Y                      | Y                | Y                      |
| Setting in which study conducted described.         | Y                      | Y                      | N                      | Y                      | Y                      | Y                      | Y                      | Y                        | Y                      | Y                | Y                      |
| Sampling and calculation of sample size described.  | N                      | N                      | N                      | N                      | N                      | N                      | Y                      | N                        | N                      | N                | N                      |
| Reliability measures                                | N                      | N                      | N                      | N                      | N                      | N                      | Y                      | N                        | N                      | N                | Y                      |
| Measures in place to ensure that results are valid. | N                      | N                      | N                      | N                      | N                      | N                      | N                      | N                        | N                      | Y                | N                      |
| Limitations of study listed.                        | N                      | Y                      | N                      | N                      | Y                      | N                      | Y                      | N                        | N                      | Y                | N                      |
| Mention of any assumptions made.                    | N                      | N                      | N                      | N                      | N                      | N                      | N                      | N                        | N                      | N                | N                      |
| Ethical approval.                                   | N                      | Y                      | N                      | N                      | Y                      | N                      | Y                      | Y                        | Y                      | Y                | Y                      |
| Total                                               | 5                      | 8                      | 2                      | 3                      | 5                      | 7                      | 8                      | 5                        | 7                      | 8                | 8                      |

Abbreviation: Y, yes; N, no

**Methodological quality assessment: MEs (Cont'd)**

|                                                     | Benkirane<br>2009 [78] | Dedefo<br>2016<br>[79] | Negash<br>2013<br>[72] | Jennane<br>2011 [80] | Kandil<br>2012<br>[73] | Sabry<br>2014<br>[75] | Sabry<br>2009<br>[76] | Nwasor<br>2014<br>[69] | Oshikoya<br>2013<br>[70] | Shehata<br>2016<br>[77] |
|-----------------------------------------------------|------------------------|------------------------|------------------------|----------------------|------------------------|-----------------------|-----------------------|------------------------|--------------------------|-------------------------|
| Aims/objectives of the study clearly stated.        | Y                      | Y                      | Y                      | Y                    | Y                      | Y                     | Y                     | Y                      | Y                        | Y                       |
| Definition of what constitutes a medication error.  | Y                      | Y                      | Y                      | Y                    | N                      | N                     | N                     | N                      | Y                        | N                       |
| Error categories specified.                         | N                      | Y                      | N                      | N                    | N                      | N                     | N                     | Y                      | Y                        | Y                       |
| Error categories defined.                           | N                      | Y                      | Y                      | N                    | Y                      | Y                     | N                     | N                      | N                        | N                       |
| Presence of a clearly defined denominator.          | Y                      | Y                      | Unclear                | Y                    | N                      | Y                     | N                     | Unclear                | N                        | Y                       |
| Data collection method described clearly.           | Y                      | Y                      | N                      | Y                    | N                      | Y                     | N                     | N                      | Y                        | Y                       |
| Setting in which study conducted described.         | Y                      | Y                      | Y                      | Y                    | Y                      | Y                     | Y                     | Y                      | Y                        | Y                       |
| Sampling and calculation of sample size described.  | N                      | N                      | N                      | N                    | N                      | N                     | N                     | N                      | N                        | N                       |
| Reliability measures                                | Y                      | Y                      | N                      | Y                    | N                      | N                     | N                     | N                      | N                        | N                       |
| Measures in place to ensure that results are valid. | Y                      | N                      | N                      | N                    | N                      | N                     | Y                     | N                      | Y                        | N                       |
| Limitations of study listed.                        | Y                      | Y                      | N                      | N                    | N                      | Y                     | Y                     | N                      | Y                        | Y                       |
| Mention of any assumptions made.                    | N                      | N                      | N                      | N                    | N                      | N                     | N                     | N                      | N                        | N                       |
| Ethical approval.                                   | N                      | Y                      | Y                      | Y                    | N                      | Y                     | N                     | N                      | Y                        | Y                       |
| Total                                               | 8                      | 7                      | 5                      | 7                    | 3                      | 7                     | 4                     | 3                      | 8                        | 7                       |

Abbreviation: Y, yes; N, no

**Methodological quality assessment: MEs (Cont'd)**

|                                                     | Acheampong<br>2016 [57] | Amponsah<br>2016 [60] | Blignaut<br>2017<br>[62] | Ogunleye<br>2016<br>[74] |  |
|-----------------------------------------------------|-------------------------|-----------------------|--------------------------|--------------------------|--|
| Aims/objectives of the study clearly stated.        | Y                       | N                     | Y                        | Y                        |  |
| Definition of what constitutes a medication error.  | Y                       | N                     | N                        | Y                        |  |
| Error categories specified.                         | Y                       | N                     | Y                        | Y                        |  |
| Error categories defined.                           | Y                       | N                     | N                        | N                        |  |
| Presence of a clearly defined denominator.          | Y                       | N                     | N                        | Y                        |  |
| Data collection method described clearly.           | Y                       | Y                     | Y                        | Y                        |  |
| Setting in which study conducted described.         | Y                       | N                     | Y                        | Y                        |  |
| Sampling and calculation of sample size described.  | N                       | N                     | Unclear                  | N                        |  |
| Reliability measures                                | Y                       | N                     | Y                        | N                        |  |
| Measures in place to ensure that results are valid. | Y                       | N                     | Y                        | N                        |  |
| Limitations of study listed.                        | Y                       | N                     | Y                        | N                        |  |
| Mention of any assumptions made.                    | Y                       | N                     | N                        | N                        |  |
| Ethical approval.                                   | Y                       | Y                     | Y                        | Y                        |  |
| Total                                               | 12                      | 2                     | 8                        | 7                        |  |

Abbreviation: Y, yes; N, no

## S4 Appendix: Definition and assessment of ADEs and MEs

### A. Definition and assessment of ADEs

| Author, year               | Definition and/or description of the incident                                                                                                     | A person/ team responsible for identification | Further verification of ADEs | Person responsible for causality, severity and preventability assessment                                    |
|----------------------------|---------------------------------------------------------------------------------------------------------------------------------------------------|-----------------------------------------------|------------------------------|-------------------------------------------------------------------------------------------------------------|
| <b>Adverse drug events</b> |                                                                                                                                                   |                                               |                              |                                                                                                             |
| Aderemi-Williams 2015 [30] | NR                                                                                                                                                | NR                                            | NR                           | NR                                                                                                          |
| Benkirane 2009 [31]        | An injury resulting from medical interventions related to a drug (WHO definition)[26]                                                             | Medical residents                             | NR                           | Causality, 2 experienced investigators<br>Severity, NR<br>Preventability, NR                                |
| Benkirane 2009 [78]        | Bates et al 1995 [25] ADE definition (ADRs and complications from MEs)                                                                            | Pharmacists investigators                     |                              | Two reviewers of the pharmacovigilance centre staffs evaluated causality and severity<br>Preventability: NR |
| Cooke 1985 [32]            | Any undesired or unintended effect of drugs                                                                                                       | NR                                            | NR                           | NR                                                                                                          |
| Eshetie 2015 [33]          | Any incident resulting in injury from any stage of the medication use process (ordering, transcribing, dispensing, administrating and monitoring) | Multidisciplinary                             | Pediatrics team              | Causality: clinical pharmacist<br>Severity and preventability: two senior pediatric residents               |
| Dedefo 2016 [79]           | An ADE refers to all ADRs, including allergic or idiosyncratic reactions, as well as MEs that result in harm to a patient                         | Pharmacist researcher                         | NR                           | Severity and preventability: one pediatrician and one clinical pharmacist                                   |
| Jennane 2011 [80]          | Any injury resulting from medical interventions related to a drug                                                                                 | A pharmacist and a physician                  | NR                           | Causality, NR<br>Severity: Physician reviewers rated the severity of ADEs<br>Preventability, NR             |

|                     |                                                                                      |                                                   |                                                                                                              |                                                                                                                                                                                   |
|---------------------|--------------------------------------------------------------------------------------|---------------------------------------------------|--------------------------------------------------------------------------------------------------------------|-----------------------------------------------------------------------------------------------------------------------------------------------------------------------------------|
| Kiguba 2017 [34]    | WHO definition of ADR [85]                                                           | A medical doctor, pharmacist and degree nurse     | Study physicians (gynecologist/obstetrician, internist) and research pharmacist (senior clinical pharmacist) | Consensus agreement on ADR causality, preventability, severity and seriousness was reached in a committee headed by the ward-based study physician and senior clinical pharmacist |
| Letaief 2010 [35]   | Injury related to medical management in contrast to complications of the disease     | Medical student                                   | 2 expert physicians                                                                                          | NR                                                                                                                                                                                |
| Mabadeje 1979 [36]  | NR                                                                                   | NR                                                | NR                                                                                                           | NR                                                                                                                                                                                |
| Matsaseng 2005 [37] | An injury that was caused by medical management (rather than the underlying disease) | Researcher                                        | Supervising specialist                                                                                       | NR                                                                                                                                                                                |
| Mehta 2008 [38]     | WHO definition of ADR [89]                                                           | Clinical pharmacology team                        | Clinical pharmacist, 4 clinical pharmacology registrars and a hospital pharmacist                            | 2 clinical pharmacology consultants assess cases for causality, severity and preventability                                                                                       |
| Mouton 2015 [39]    | ADR according to the definition of Aronson and Ferner <sup>a</sup>                   | Clinical pharmacologist                           | Clinical pharmacologist, clinical pharmacist, at least 1 physician/internist                                 | A multidisciplinary review panel assessed ADRs for causality and preventability                                                                                                   |
| Mouton 2016 [40]    | ADR according to the definition of Aronson and Ferner <sup>a</sup>                   | One medical doctor and 2 pharmacists              | Multidisciplinary panel discussion                                                                           | A multidisciplinary case review panel assessed ADRs for causality, preventability, and severity                                                                                   |
| Oshikoya 2007 [41]  | WHO definition of ADR [26]                                                           | Clinical pharmacologist, pediatrician, pharmacist | Pharmacists, pharmacologist, pediatric dermatologist                                                         | NR                                                                                                                                                                                |
| Oshikoya 2011 [42]  | WHO definition of ADR [26]                                                           | A pediatric clinical pharmacologist,              | NR                                                                                                           | The pediatric clinical pharmacologist and one of the two pharmacists assess the                                                                                                   |

|                         |                                                              |                                                           |    |                                                                               |
|-------------------------|--------------------------------------------------------------|-----------------------------------------------------------|----|-------------------------------------------------------------------------------|
|                         |                                                              | pediatricians, <sup>2</sup><br>hospital pharmacists       |    | suspected ADRs for causality,<br>severity and preventability<br>independently |
| Tipping 2006 [43]       | ADEs, as defined by the South<br>African Medicines Formulary | Primary physician<br>and/or the principal<br>investigator | NR | NR                                                                            |
| Tumwikirize<br>2011[44] | WHO definition of ADR [89]                                   | A physician and<br>a pharmacist                           | NR | NR                                                                            |

NR, Not reported

<sup>a</sup>Aronson JK, Ferner RE. Clarification of terminology in drug safety. Drug Saf 2005; 28:851-70.



## B. Definition and assessment of MEs

| Author, year              | Definition and/or description of the incident                                                                                                                                                                                                          | Person/team assessing the clinical significance     |
|---------------------------|--------------------------------------------------------------------------------------------------------------------------------------------------------------------------------------------------------------------------------------------------------|-----------------------------------------------------|
| <b>Prescribing errors</b> |                                                                                                                                                                                                                                                        |                                                     |
| Agalu 2011 [45]           | Prescribing error implies deviation of medication prescribing from standard practices excluding dosage form errors, illegible hand writing, and failure to authenticate the prescription with signature and/or date                                    | NR                                                  |
| Ajemigbitse 2016 [49]     | NR                                                                                                                                                                                                                                                     | NR                                                  |
| Ajemigbitse 2013 [46]     | Any deviation from a complete, accurate and legible prescription, as it pertains to errors on the prescription and not the prescribing decision or dispensed medicines                                                                                 | 3 clinical pharmacists                              |
| Ajemigbitse 2014 [48]     | NR                                                                                                                                                                                                                                                     | NR                                                  |
| Ajemigbitse 2013 [47]     | A prescribing decision or prescription writing process that results in an unintentional, significant reduction in the probability of treatment being timely and effective or increases the risk of harm when compared with generally accepted practice | NR                                                  |
| Alagha 2011 [50]          | An error that occurs at the stage of prescribing excluding date of order and signature of the prescriber                                                                                                                                               | A clinical pharmacist and a consultant pediatrician |
| Arulogun 2011 [51]        | Prescriptions were evaluated for legality (name of patient, date, prescription number, signature) and for other types of error such as dose, duration, illegible writing                                                                               | NR                                                  |
| Oshikoya 2007 [52]        | NR                                                                                                                                                                                                                                                     | NR                                                  |
| Sada 2015 [53]            | Prescribing error: deviation of medication prescribing from standard practices (as indicated in standard treatment guidelines, textbooks, and software) excluding, indication without drug, dosage form errors, illegible                              | The principal investigator and 1 internist          |

|                                         |                                                                                                                                                                                             |                        |
|-----------------------------------------|---------------------------------------------------------------------------------------------------------------------------------------------------------------------------------------------|------------------------|
|                                         | hand writing, and failure to authenticate the prescription with signature and/or date.                                                                                                      |                        |
| Yinusa 2004 [54]                        | All prescription items which did not conform to the criteria for prescription writing as stated in the British National formulary                                                           | NR                     |
| Yousif 2011 [55]                        | Neville et al [97] definition of prescribing errors                                                                                                                                         | NR                     |
| Zelege 2014 [56]                        | Deviation of medication prescribing from standard practices and includes inappropriate (incorrect) drug selection, wrong dose, wrong frequency, wrong route and wrong dosage form           | NR                     |
| <b>Medication administration errors</b> |                                                                                                                                                                                             |                        |
| Acheampong 2016 [57]                    | An administration error is said to be occurred when what was administered is different from what had been prescribed.                                                                       | 2 clinical pharmacists |
| Agalu 2012 [58]                         | Deviation from the conventional method of administration of a particular drug as ordered by the prescribing physician                                                                       | NR                     |
| al Tehewy 2016 [59]                     | A deviation from a prescriber's valid prescription or the hospital's policy in relation to drug administration, including failure to correctly document the administration of a medication. | NR                     |
| Amponsah 2016 [60]                      | NR                                                                                                                                                                                          | Self-report            |
| Amucheazi 2009 [61]                     | NR                                                                                                                                                                                          | NR                     |
| Blignaut 2017 [62]                      | NR                                                                                                                                                                                          | NR                     |
| Gordon 2004 [63]                        | Wrong drug administrations or the right drug into the wrong site                                                                                                                            | Self-report            |
| Gordon 2006 [64]                        | Wrong drug administrations                                                                                                                                                                  | Self-report            |
| Feleke 2010 [65]                        | A medication error that occurs while administering a medication to a patient including unauthorized use of medicines                                                                        | NR                     |
| Feleke 2015 [66]                        | Medication administration error: A medication error (time, dose, missed drug, unauthorized, route, technique, and documentation errors) that occurs while the time of                       | NR                     |

|                                  |                                                                                                                                                                                                                                                                                                                                                                                                                  |                                             |
|----------------------------------|------------------------------------------------------------------------------------------------------------------------------------------------------------------------------------------------------------------------------------------------------------------------------------------------------------------------------------------------------------------------------------------------------------------|---------------------------------------------|
|                                  | administering IV, IM, SC, and PO medication to the patient by the nurse                                                                                                                                                                                                                                                                                                                                          |                                             |
| Labuschagne 2011 [67]            | NR                                                                                                                                                                                                                                                                                                                                                                                                               | Self-report                                 |
| Llewellyn 2009 [68]              | NR                                                                                                                                                                                                                                                                                                                                                                                                               | Self-report                                 |
| Nwasor 2014 [69]                 | NR                                                                                                                                                                                                                                                                                                                                                                                                               | Self-report                                 |
| Oshikoya 2013 [70]               | Wrong medicine dose measurement, administration of wrong medicines, wrong patient, wrong route of administration, wrong timing and speed of administration, and omission of medications                                                                                                                                                                                                                          | NR                                          |
| <b>Medication errors (Mixed)</b> |                                                                                                                                                                                                                                                                                                                                                                                                                  |                                             |
| Agu 2014 [71]                    | NR                                                                                                                                                                                                                                                                                                                                                                                                               | NR                                          |
| Dedefo 2016 [79]                 | NR                                                                                                                                                                                                                                                                                                                                                                                                               | NR                                          |
| Benkirane 2009 [78]              | Adopted from NCCMERP [24]                                                                                                                                                                                                                                                                                                                                                                                        | 2 reviewers of the pharmacovigilance center |
| Negash 2013 [72]                 | Adopted from ASHP <sup>b</sup>                                                                                                                                                                                                                                                                                                                                                                                   | NR                                          |
| Jennane 2011[80]                 | Adopted from NCCMERP [24]                                                                                                                                                                                                                                                                                                                                                                                        | 2 physician evaluators                      |
| Kandil 2012 [73]                 | Administration error: a medication error that occurred while administering a medication to a patient including unauthorized error,<br>Prescription error: a failure in the prescription writing process that resulted in a wrong instruction                                                                                                                                                                     | NR                                          |
| Ogunleye 2016 [74]               | Any error in prescribing, dispensing, or administration of drugs, irrespective of whether such errors lead to adverse consequences or not                                                                                                                                                                                                                                                                        | NR                                          |
| Sabry 2014 [75]                  | Prescribing errors, adopted from Anderson 2003;<br>Administration errors, any deviation from the physician's medication order as written on the patient's chart including timing problems, missing doses as observed from the administration sheet and after confirming with the nurse, an extra dose as observed from the quantities of unit doses remaining in the patient's tray, or wrong infusion flow rate | NR                                          |

|                   |                                                                             |    |
|-------------------|-----------------------------------------------------------------------------|----|
| Sabry 2009 [76]   | Any problems connected with medications prescribed to the enrolled patients | NR |
| Shehata 2016 [77] | Adopted from NCCMERP [24]                                                   | NR |

NR, not reported

<sup>b</sup> ASHP guidelines on preventing medication errors in hospitals. Am J Hosp Pharm 1993; 50:305-14.
